# Supplementary material for: Distance-dependent consensus thresholds for generating group-representative structural brain networks
Source: PubMed Central journal article supplement (PMC6444521; doi:10.1162/netn_a_00075), 2019-03-01
Supplement: netn-03-475-s001.pdf [file netn-03-475-s001.pdf]

Betzel, R. F., Griffa, A., Hagmann, P., & Mišić, B. (2019). Supporting information for "Distance-dependent consensus thresholds for generating group-representative structural brain networks." *Network Neuroscience*, 3(2), 475–496. [https://doi.org/10.1162/netn\\_a\\_00075](https://doi.org/10.1162/netn_a_00075)

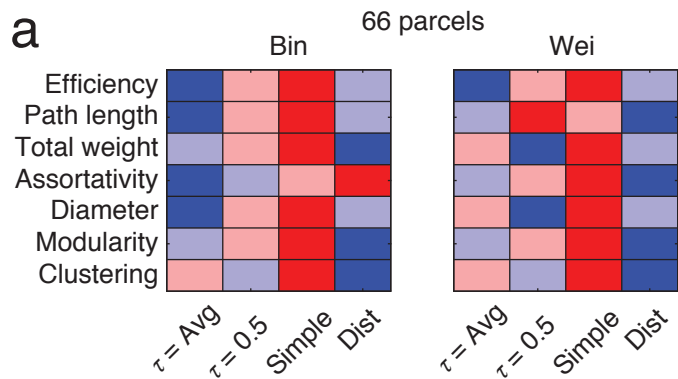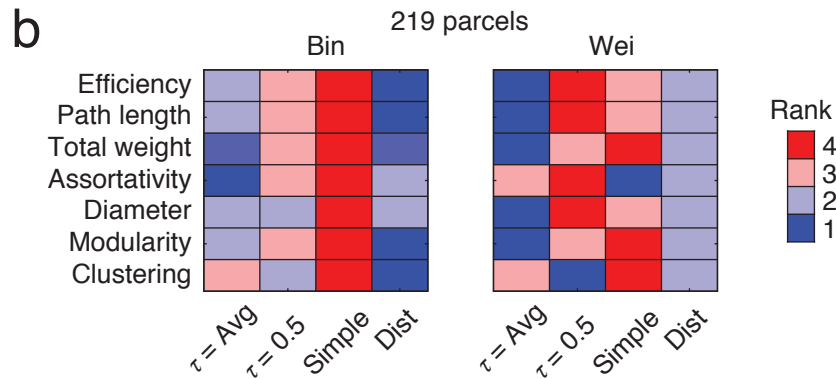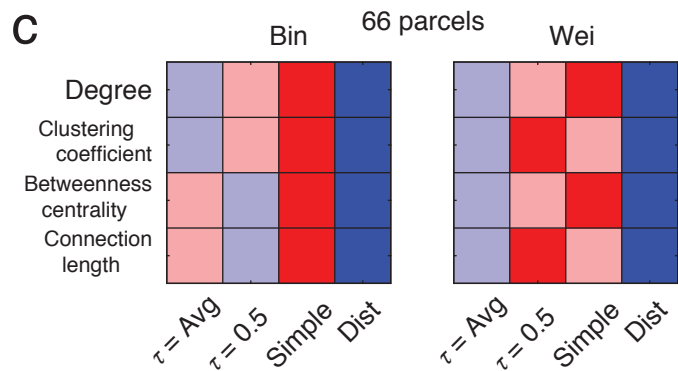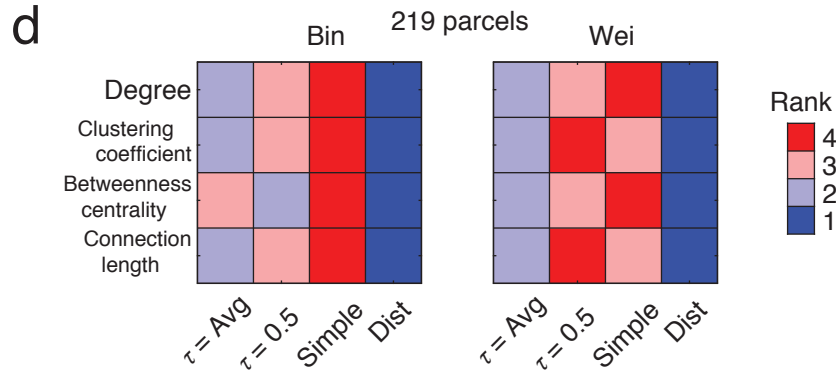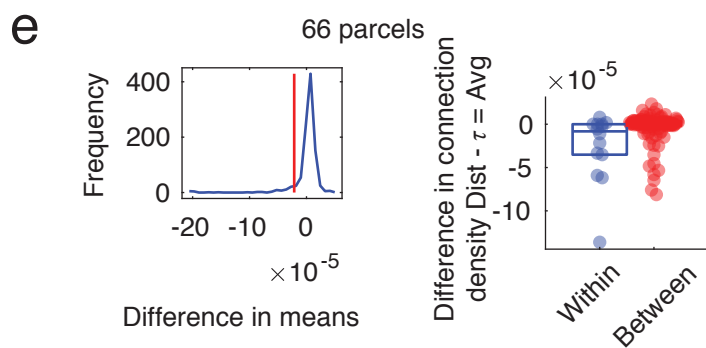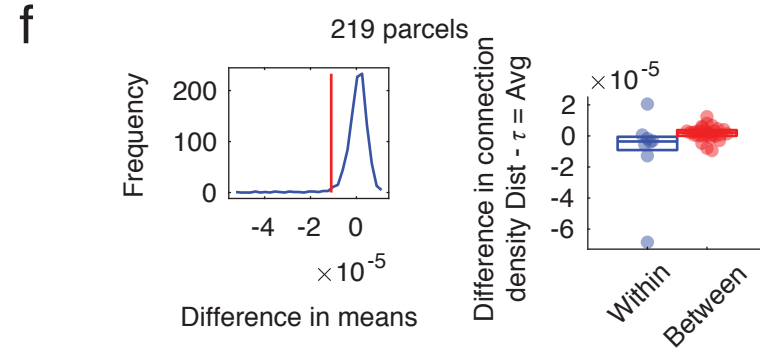

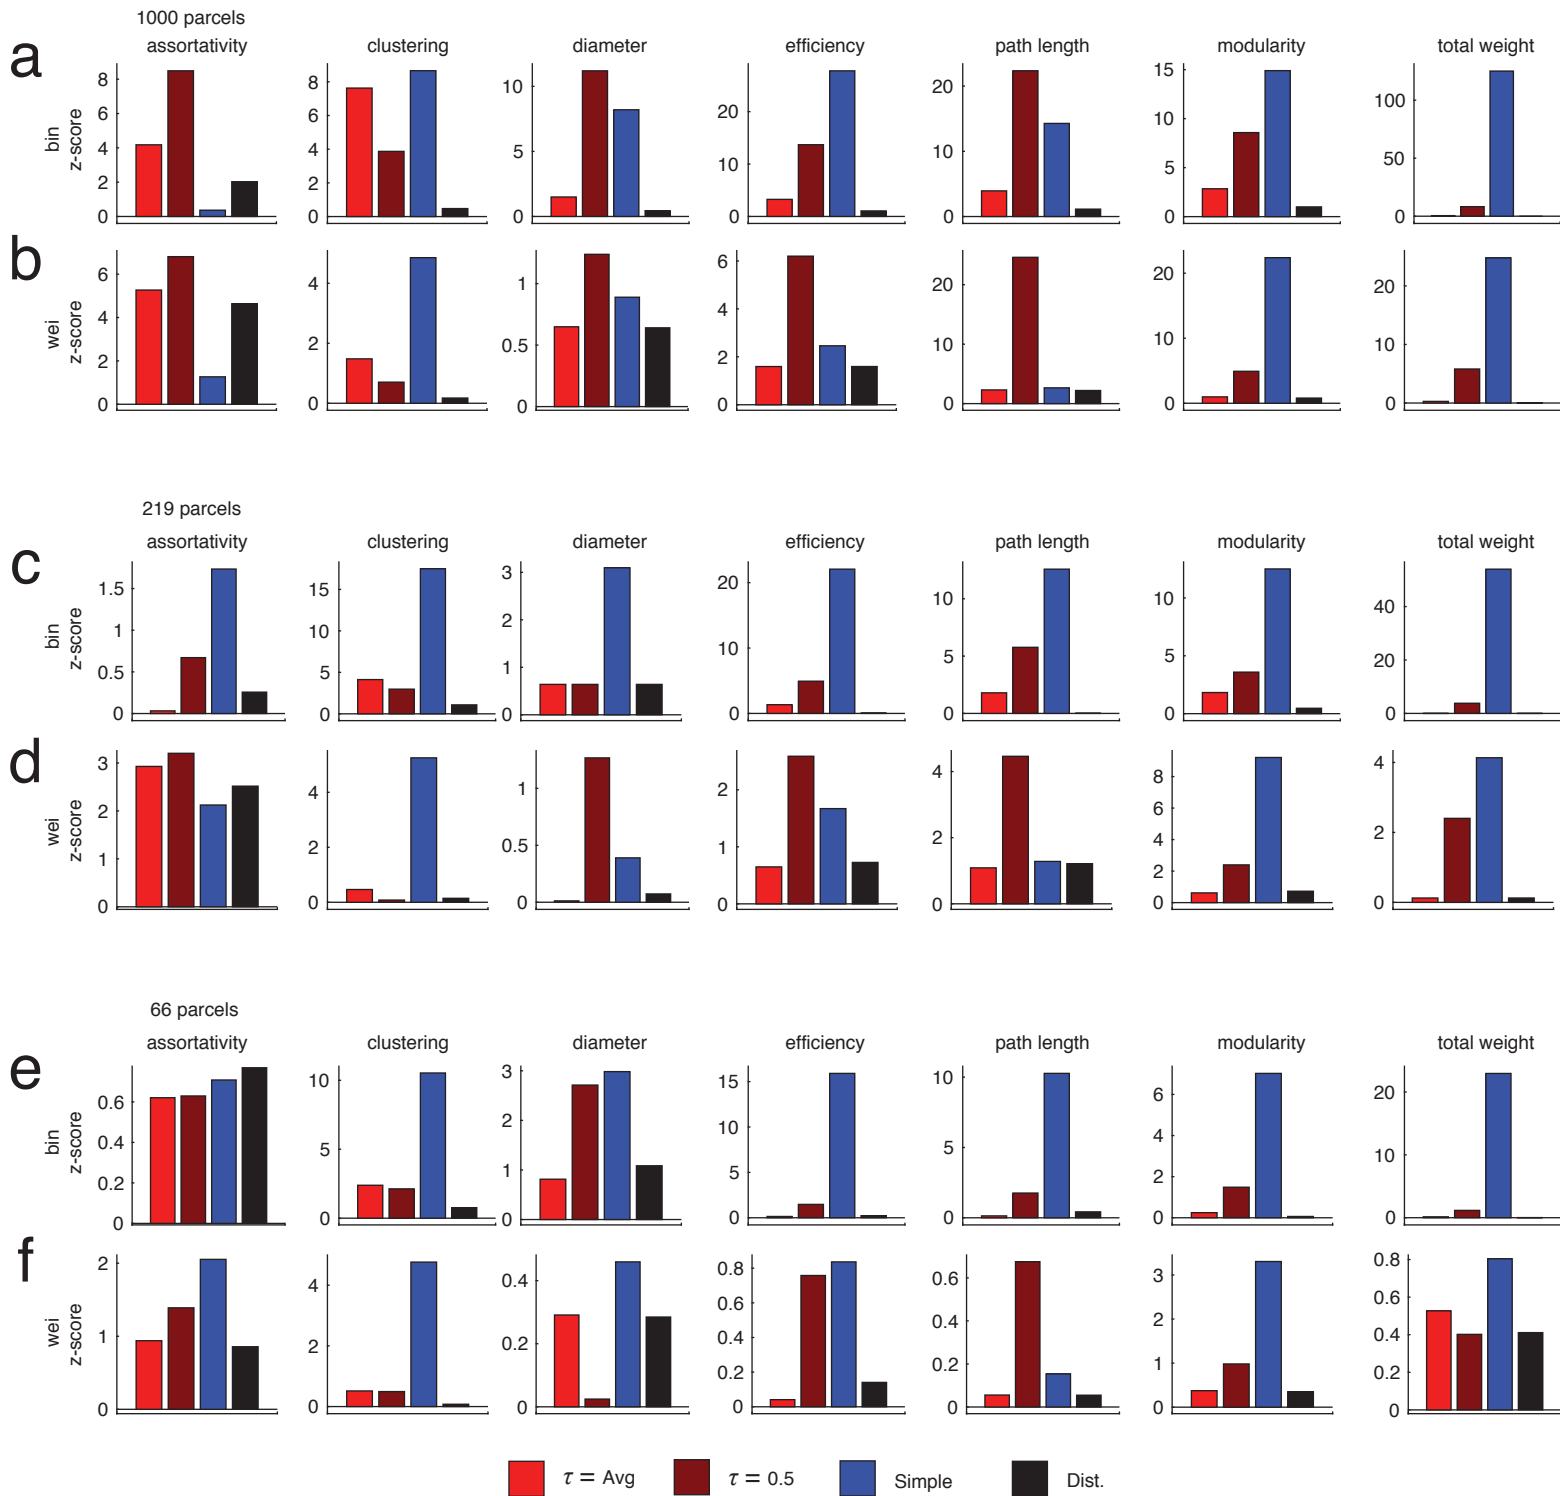

N = 68 nodes

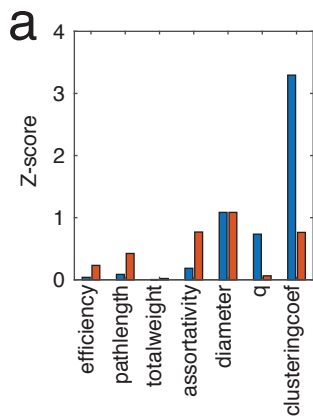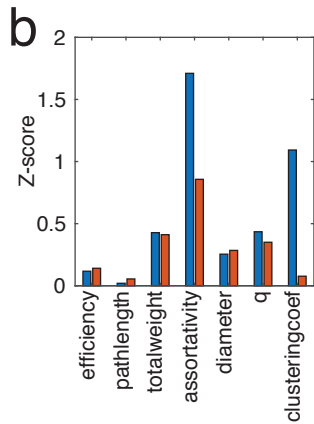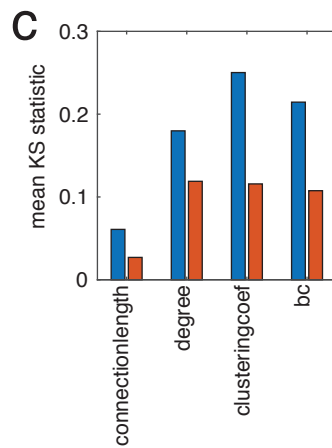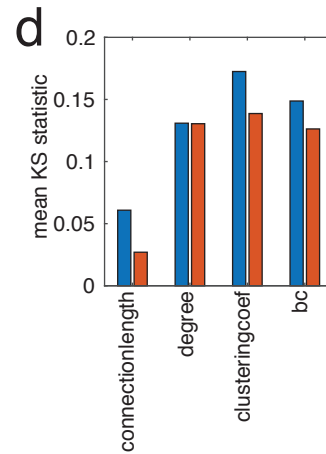

N = 1000 nodes

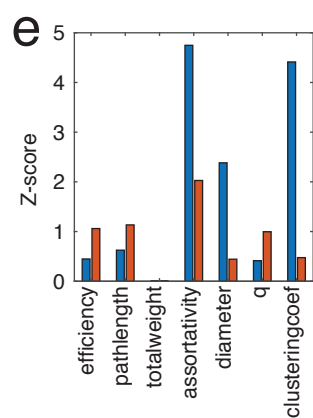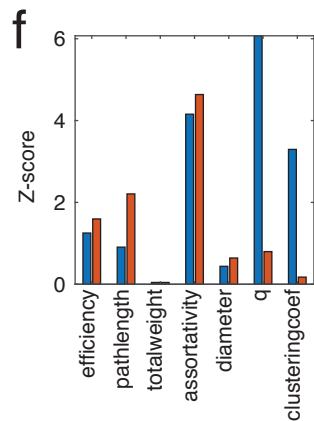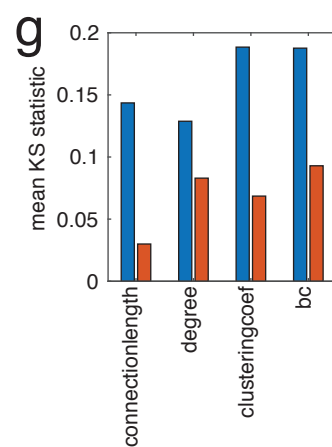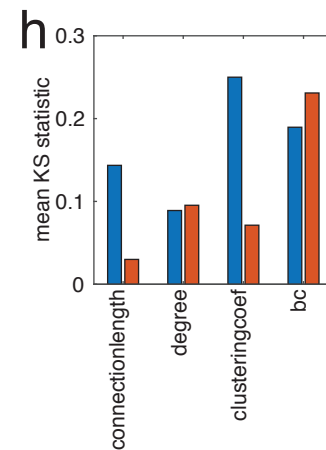

■ Uniform weight-based threshold  
■ Distance-dependent consensus method
